# Supplementary material for: The effect of temperature and retention time on methane production and microbial community composition in staged anaerobic digesters fed with food waste
Source: PubMed Central journal article supplement (PMC5729454; doi:10.1186/s13068-017-0989-4), 2017-12-14

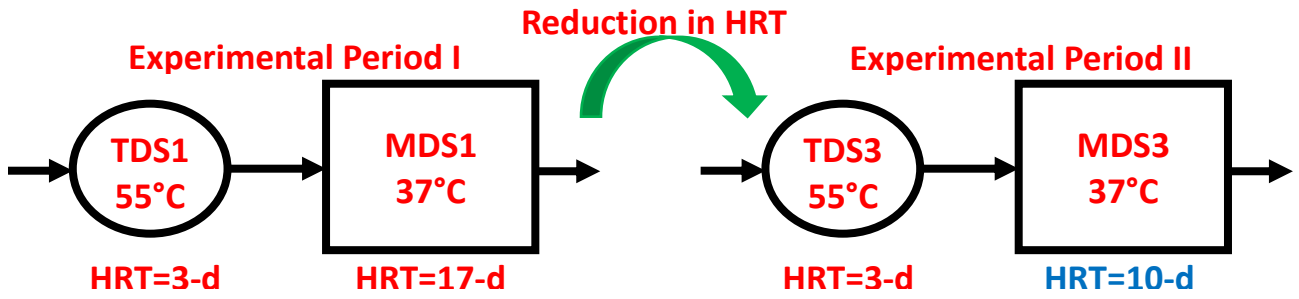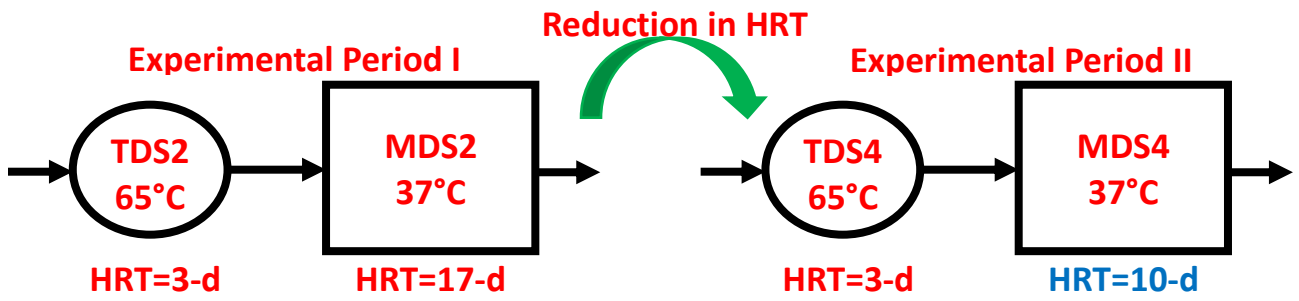

Supplement: 13068_2017_989_MOESM2_ESM.pdf [file 13068_2017_989_MOESM2_ESM.pdf]
